# Supplementary material for: Hypoargininemia exacerbates airway hyperresponsiveness in a mouse model of asthma
Source: Springer Nature journal article supplement (doi:10.1186/s12931-018-0809-9), 2018-05-23
Supplement: MOESM1 [file 15786106]

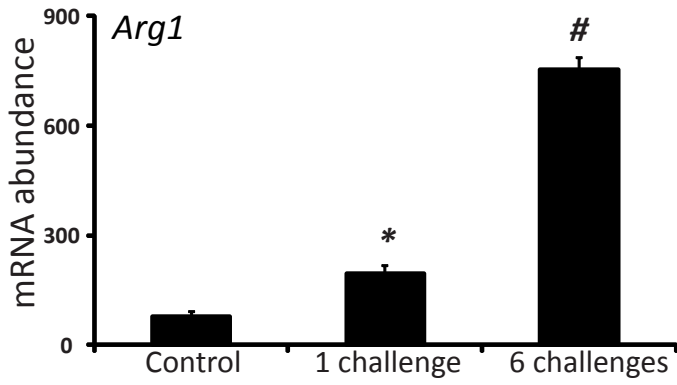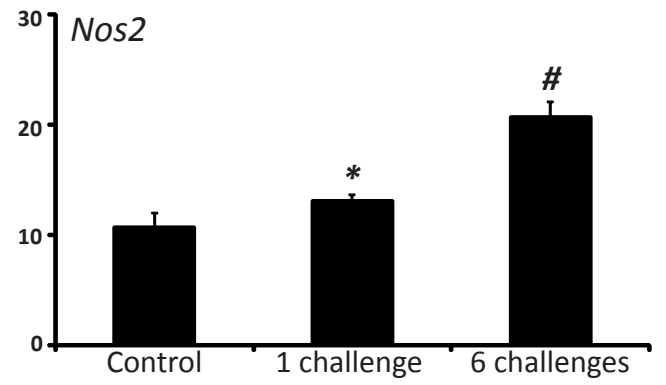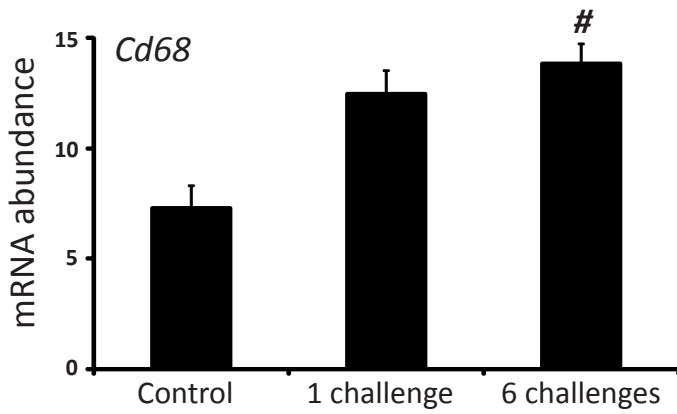

Supplemental Figure 1S. *Arg1*, *Nos2*, and *Cd68* expression in lungs of OVA-sensitized FVB mice before (Control,  $n=4$ ) and after 1 ( $n=12$ ) or 6 ( $n=12$ ) challenges with aerosolized OVA. \* =  $p < 0.001$  compared to control, # =  $p < 0.001$  compared to control
